# Supplementary material
Source: PubMed Central journal article supplement (PMC6309402)

# Supplementary Figure S1

**a**

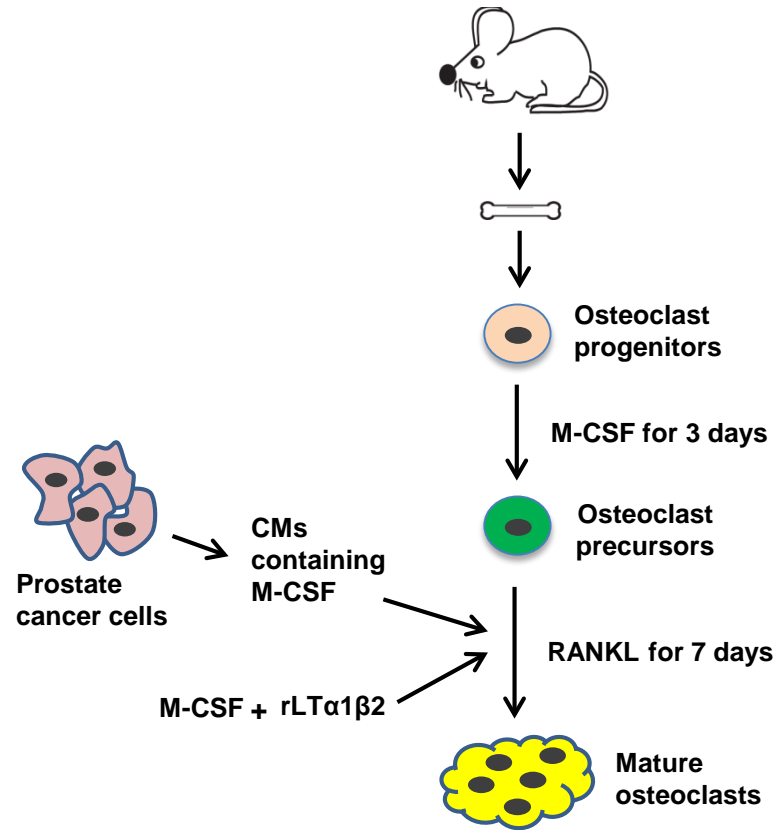

**b**

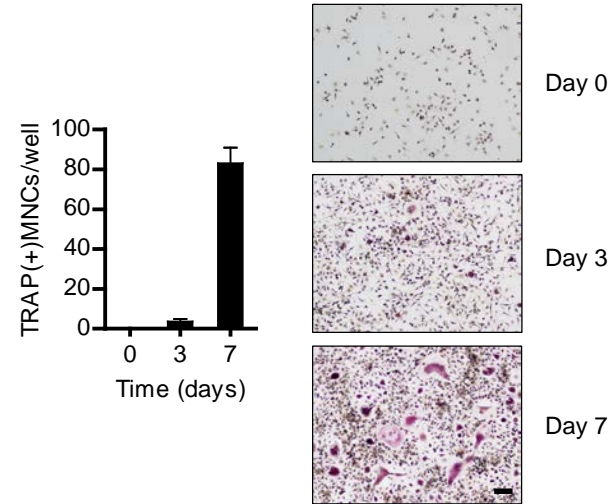

# Supplementary Figure S2

**a**

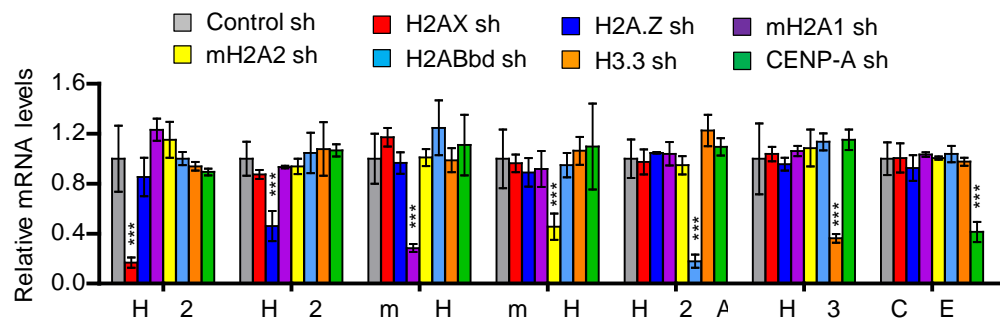

**b**

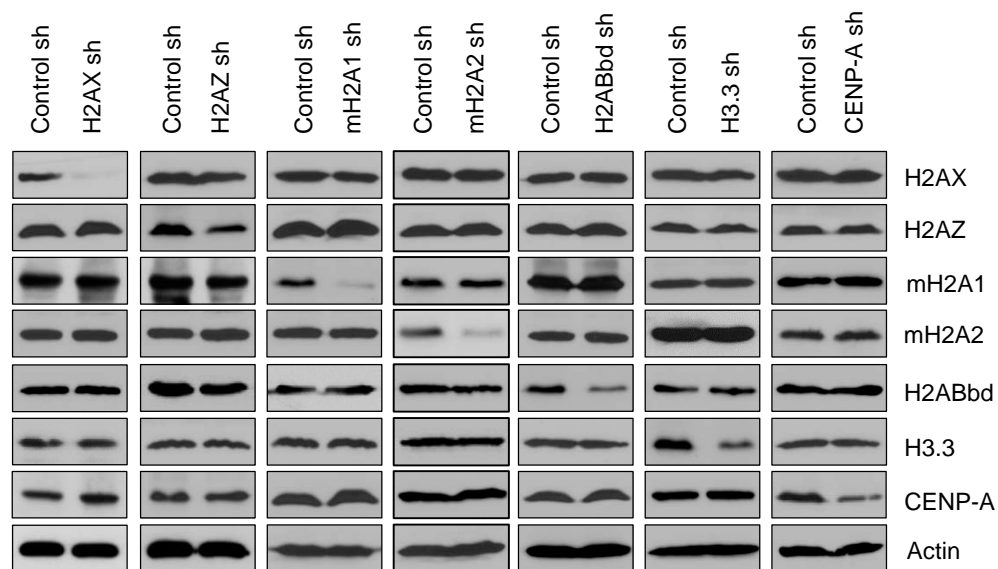

**c**

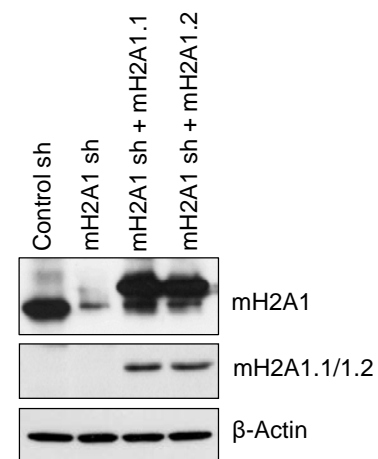

# Supplementary Figure S3

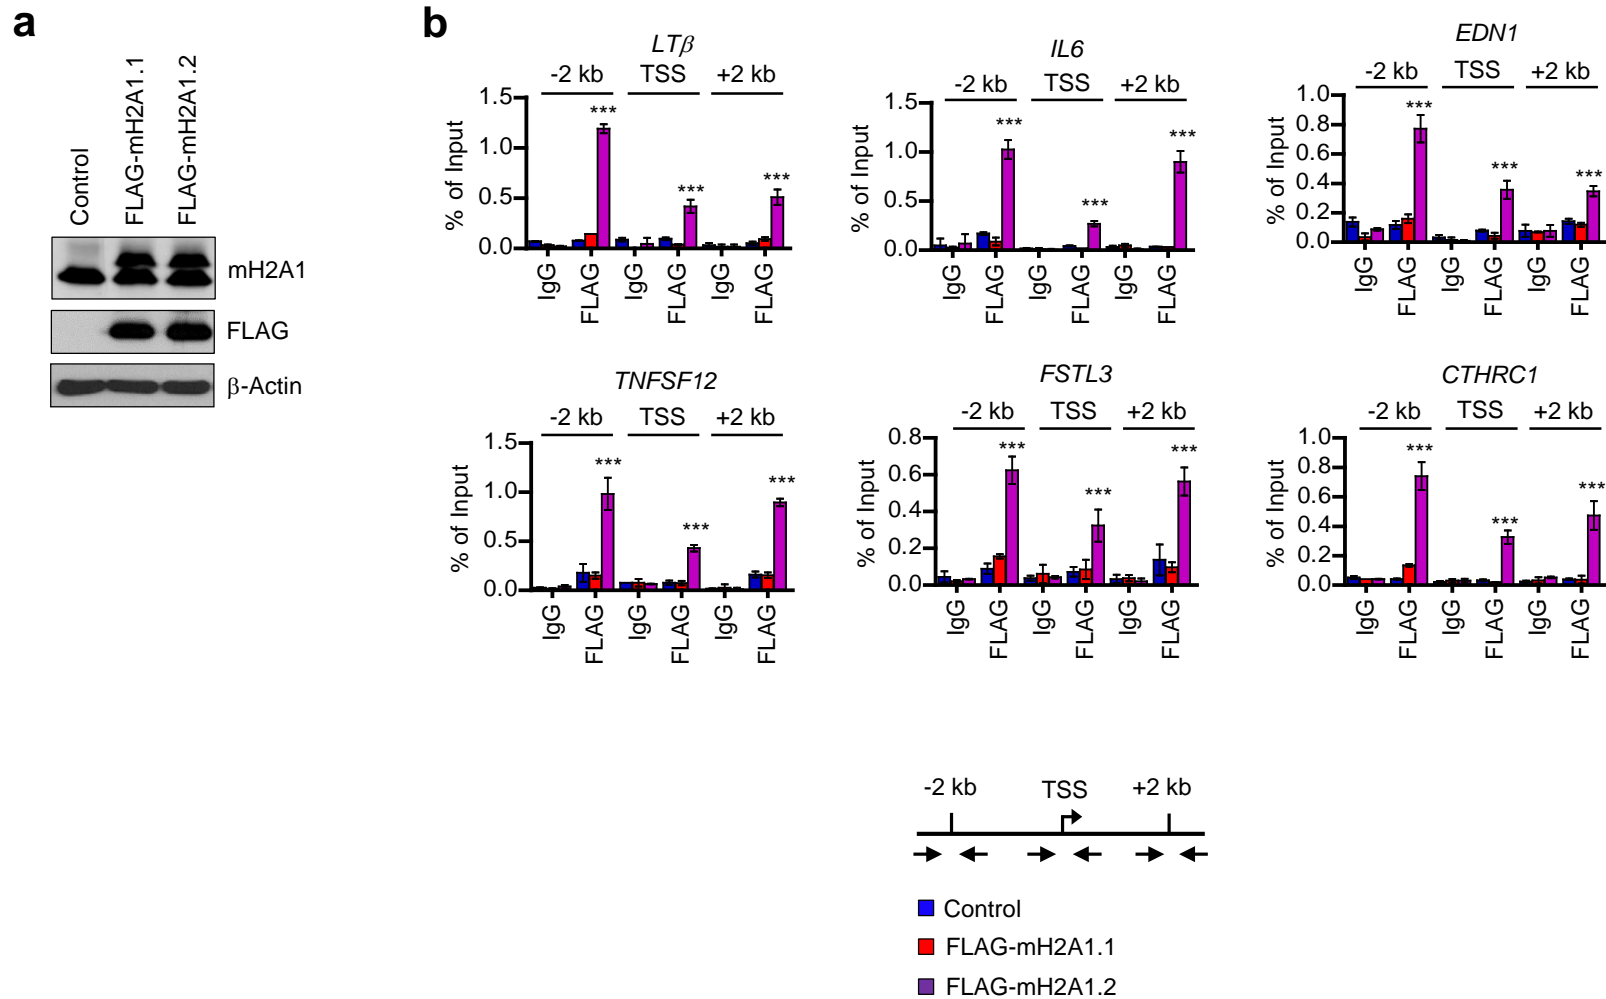

# Supplementary Figure S4

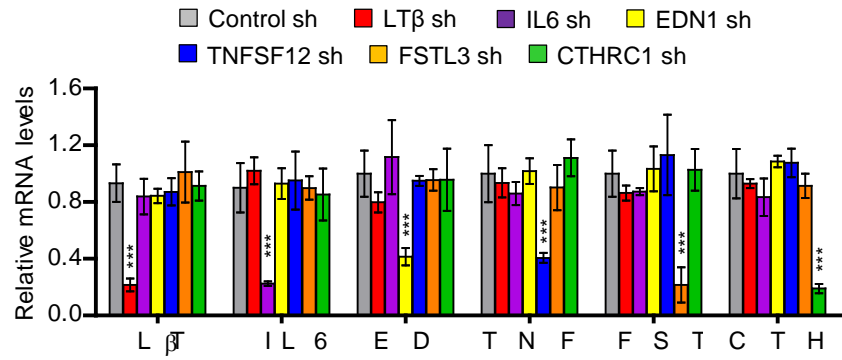

# Supplementary Figure S5

**a**

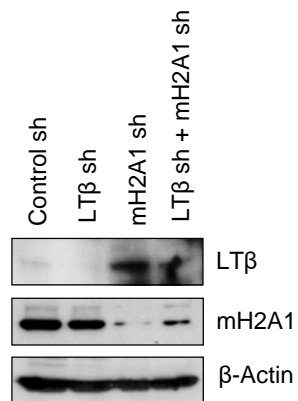

**b**

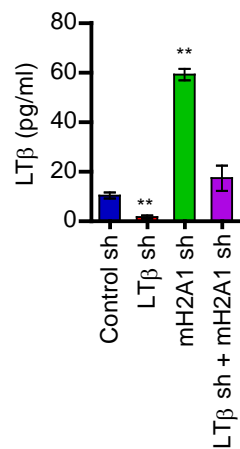

**c**

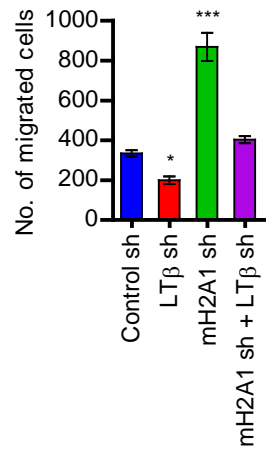

**d**

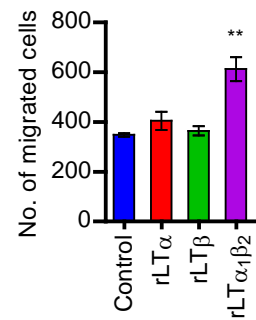

# Supplementary Figure S6

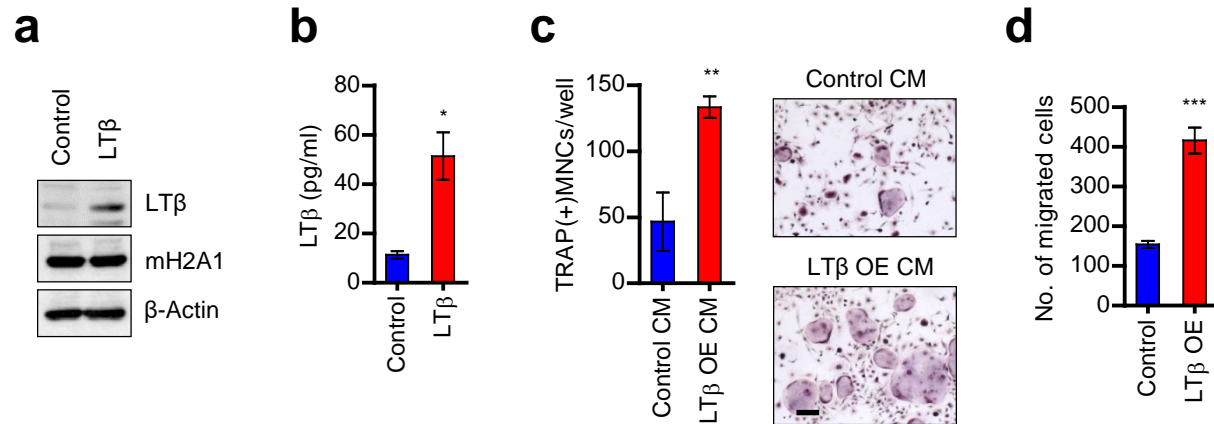

# Supplementary Figure S7

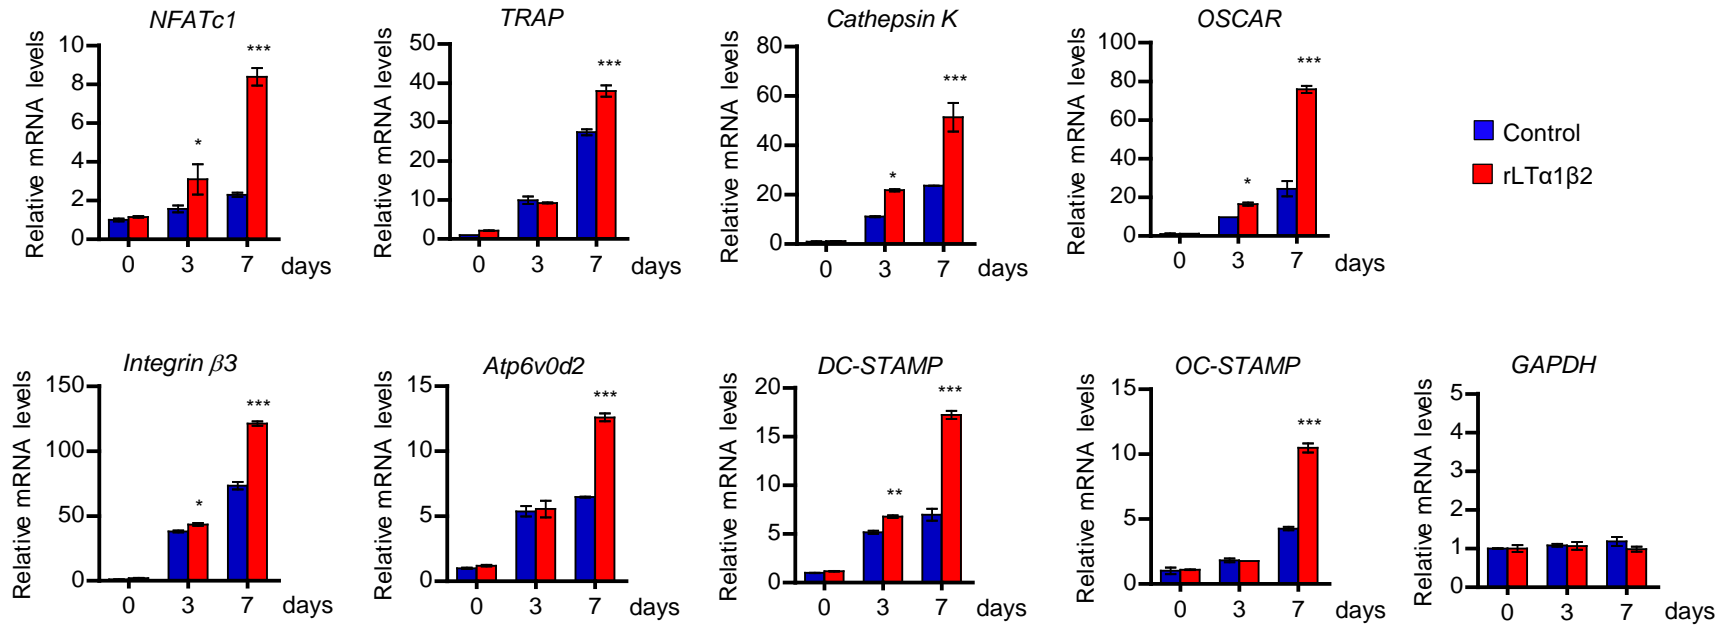

# Supplementary Figure S8

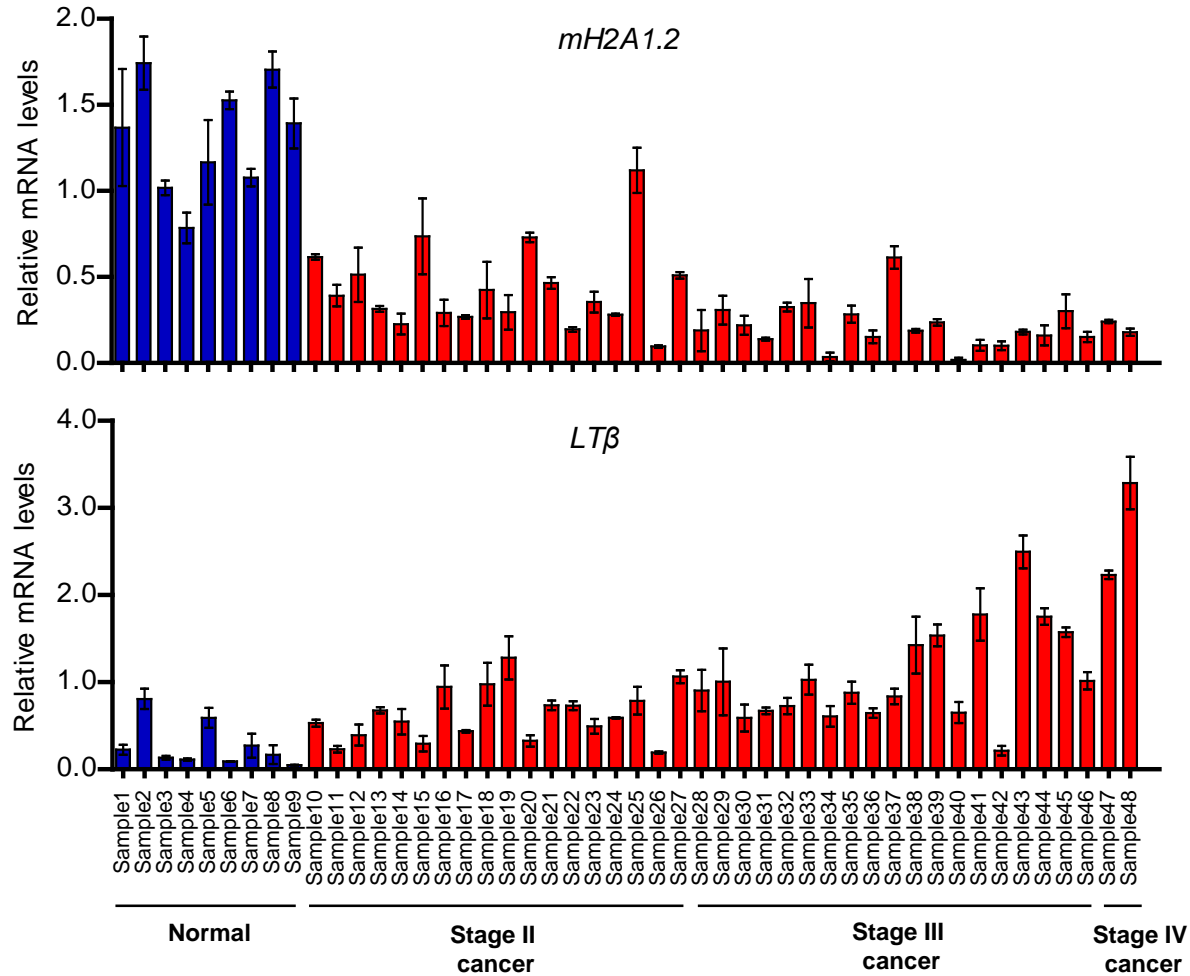



# Supplementary Figure S9

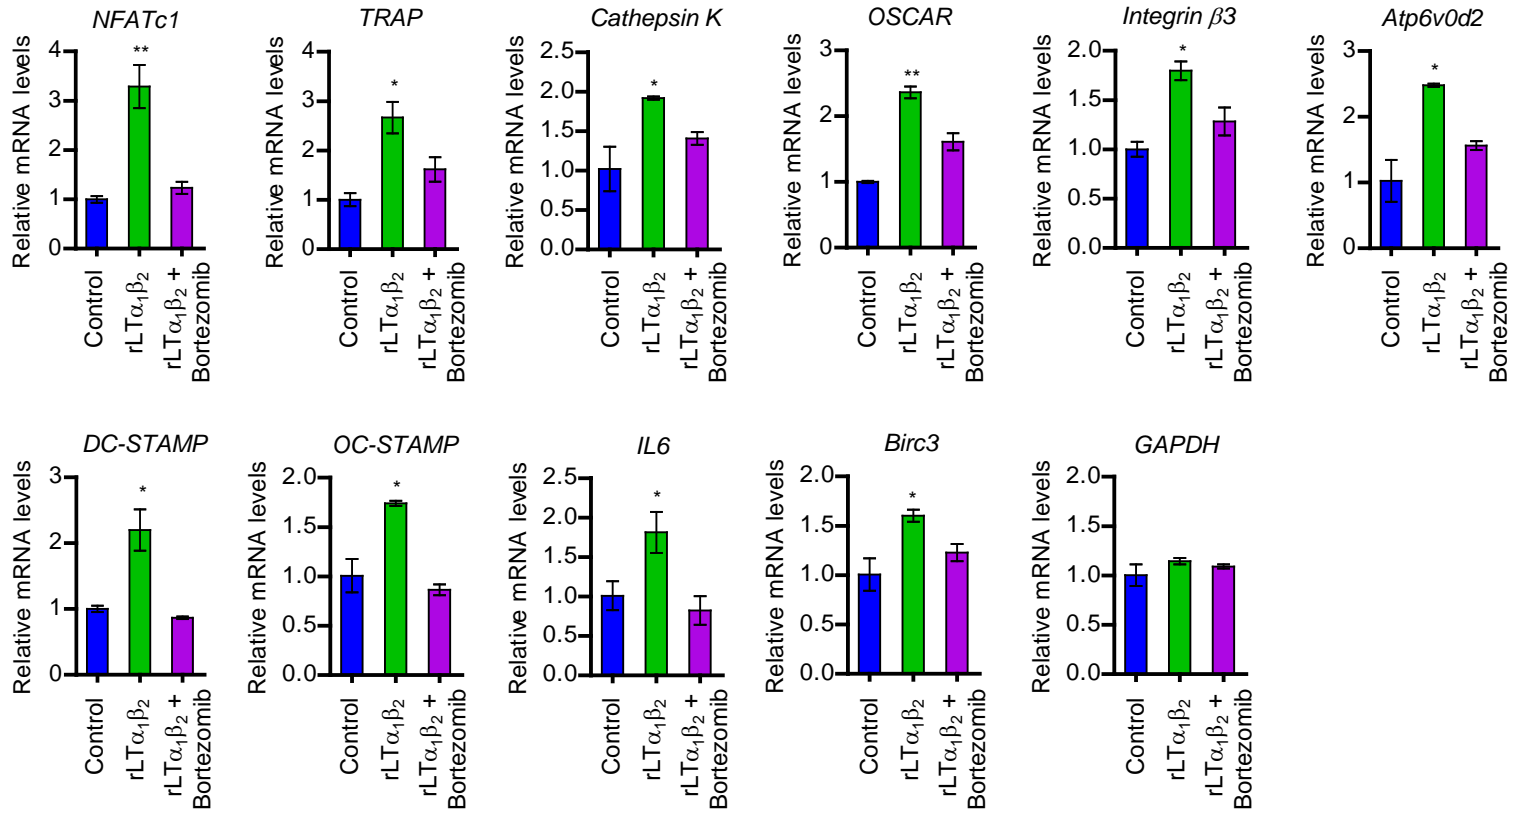

# Supplementary Figure S10

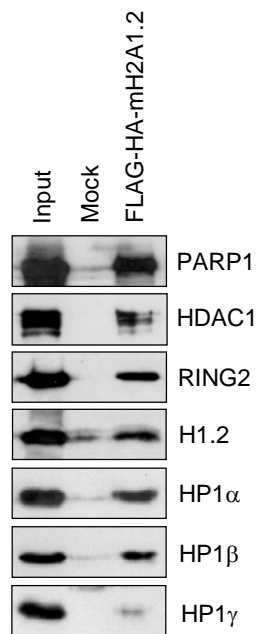

# Supplementary Figure S11

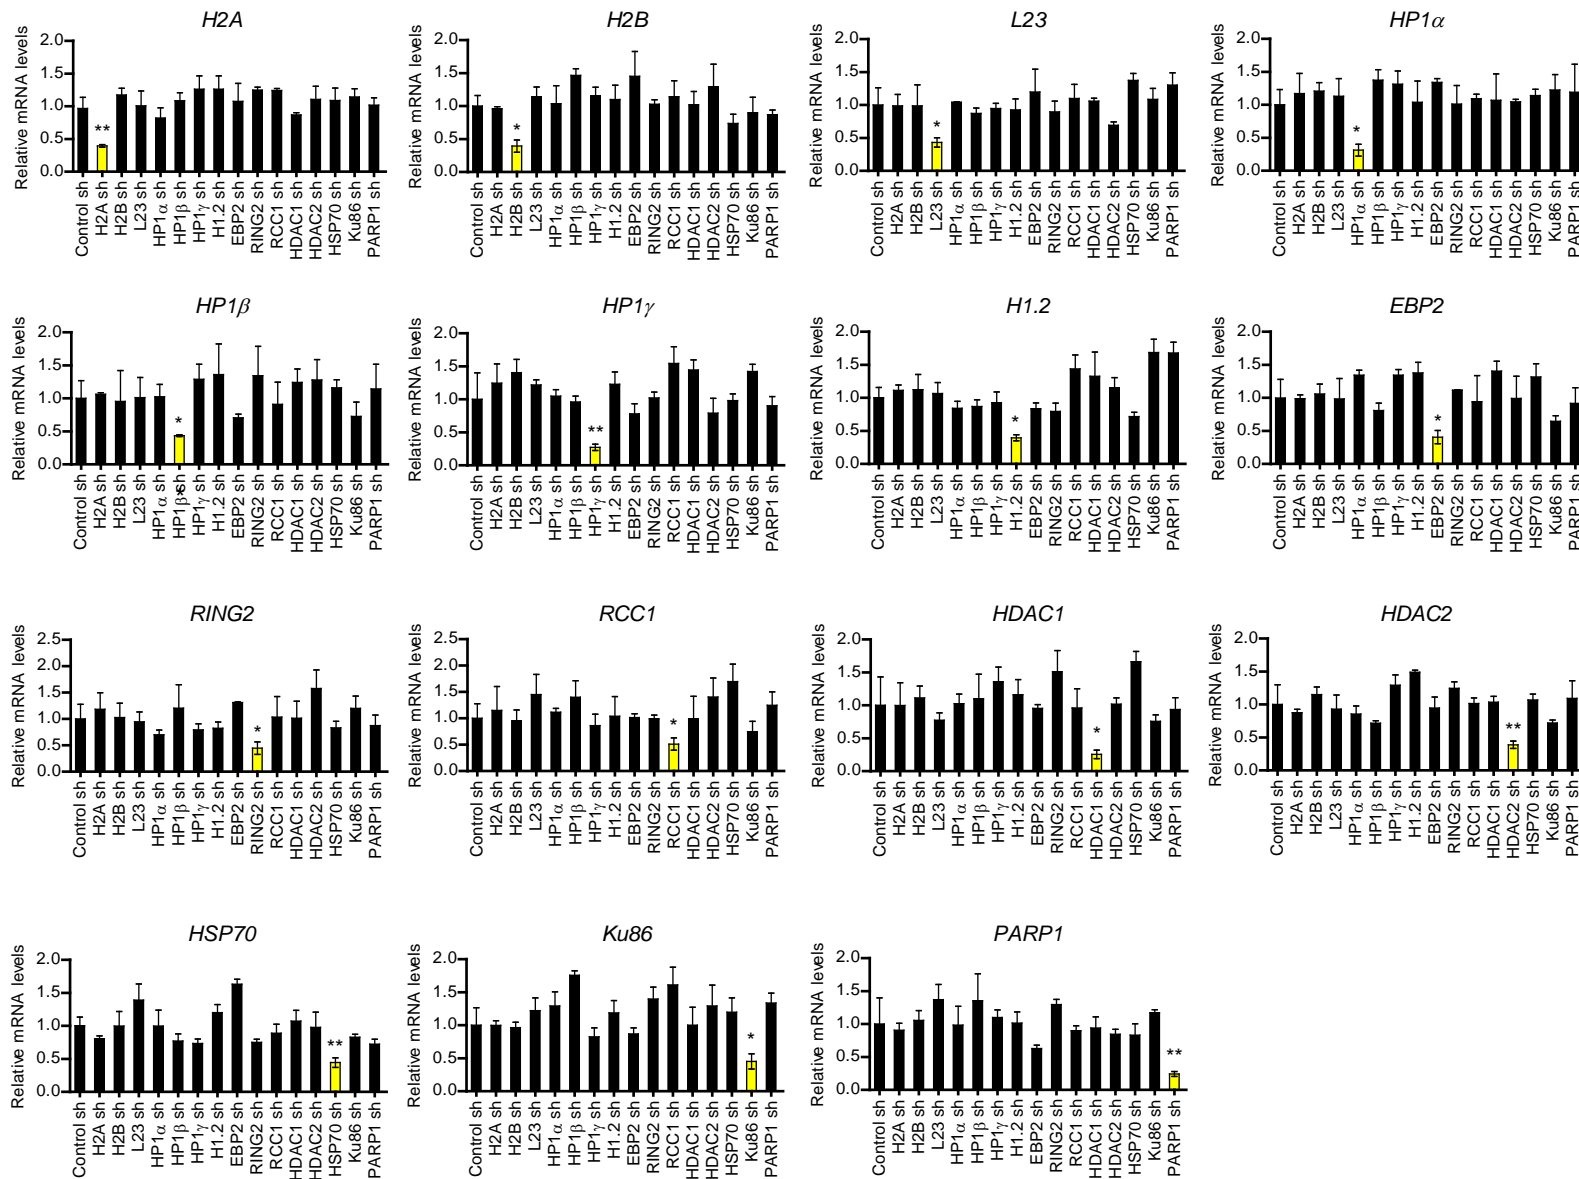

# Supplementary Figure S12

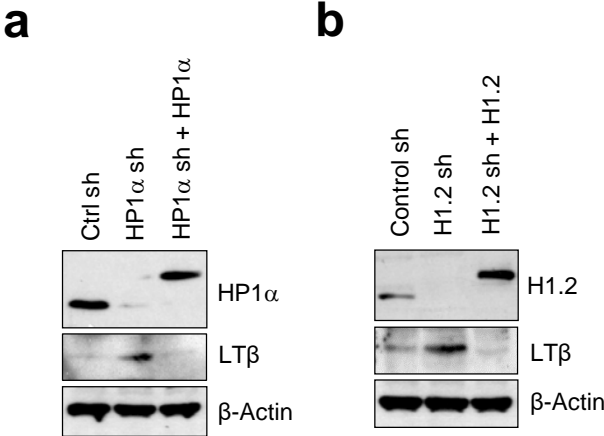

# Supplementary Figure S13

**a**

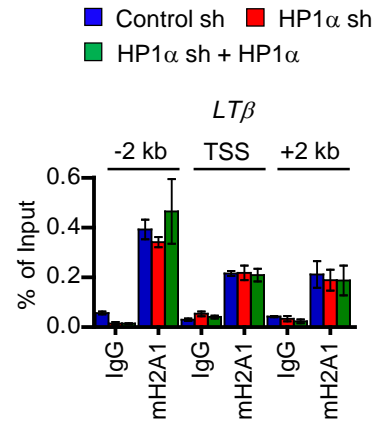

**b**

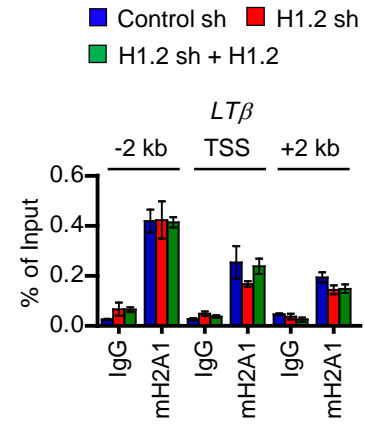

## Supplementary Figure S14

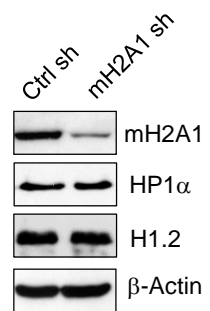

# Supplementary Figure S15

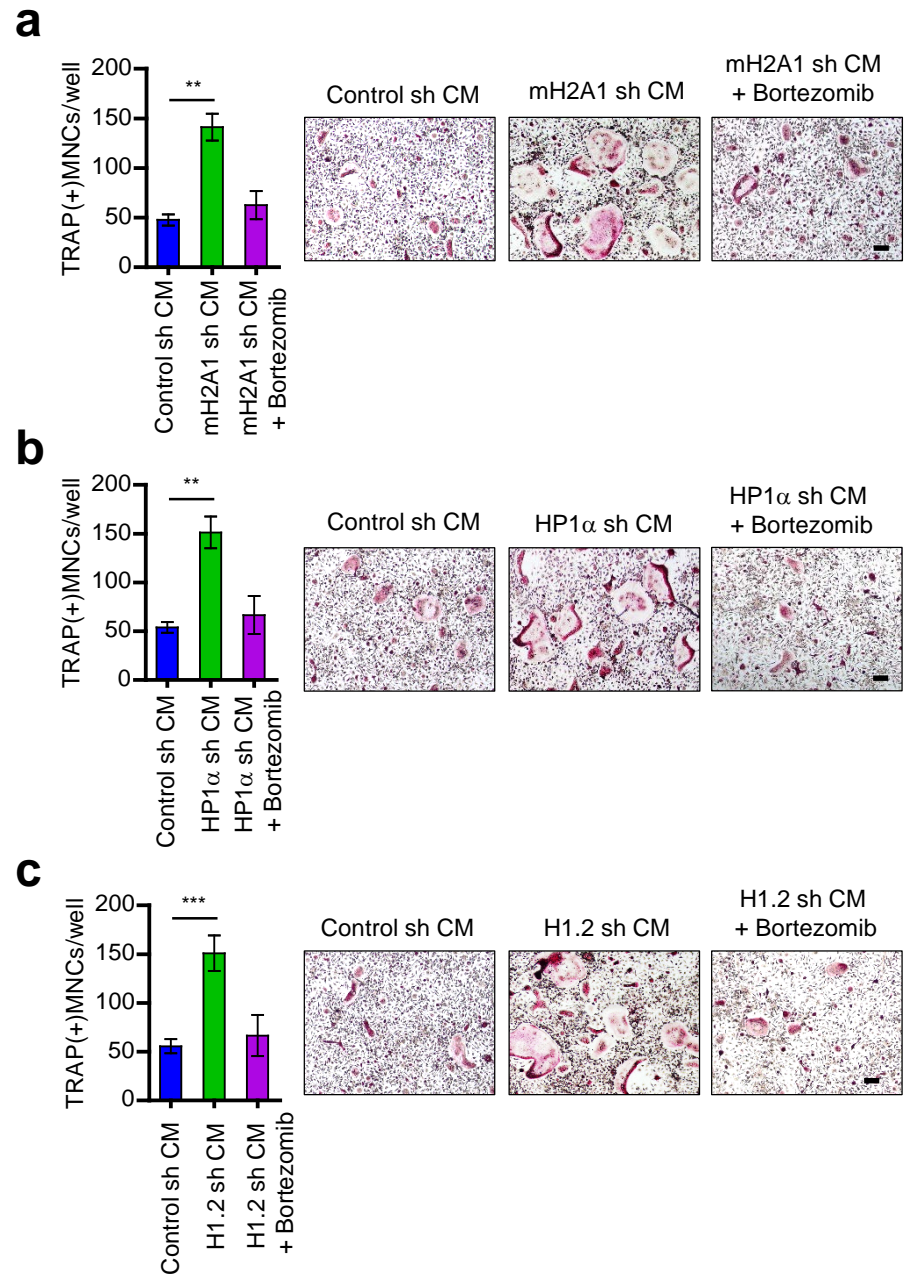

# Supplementary Figure S16

**a**

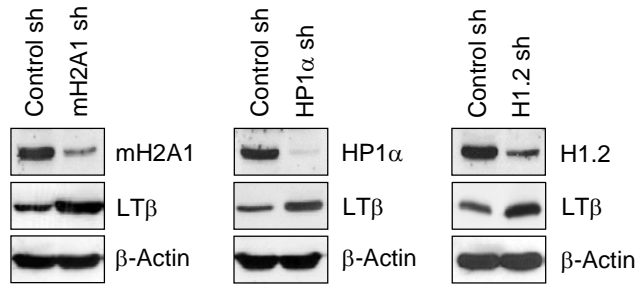

**b**

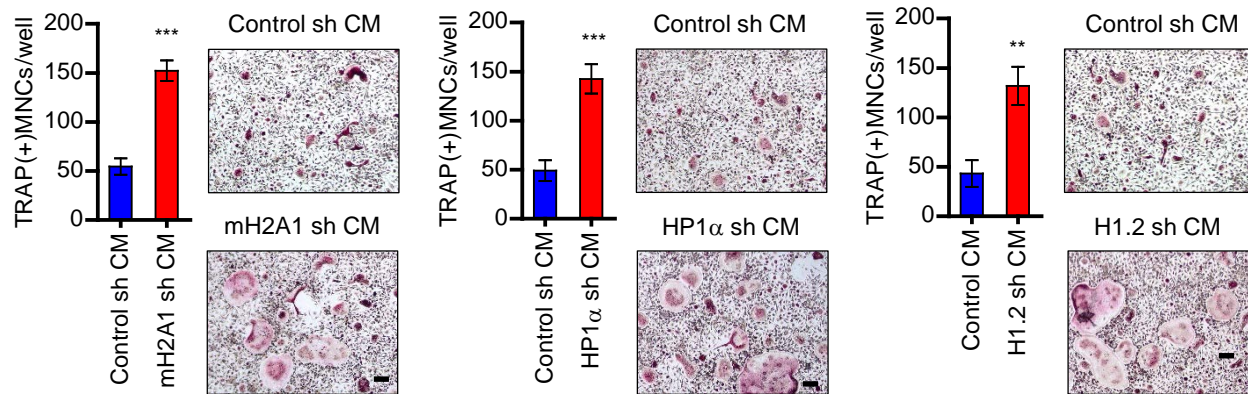

Supplement: NIHMS969304-supplement-1.pdf [file NIHMS969304-supplement-1.pdf]
